# Supplementary material for: Effects of Nutritional Education Interventions on Metabolic Risk in Children and Adolescents: A Systematic Review of Controlled Trials
Source: Nutrients. 2019 Dec 21;12(1):31. doi: 10.3390/nu12010031 (PMC7019568; doi:10.3390/nu12010031)
Supplement: Supplementary file 1 [file nutrients-12-00031-s001.pdf]

|                          | Random sequence generation (selection bias) | Allocation concealment (selection bias) | Blinding of participants and personnel (performance bias) | Blinding of outcome assessment (detection bias) | Incomplete outcome data (attrition bias) | Selective reporting (reporting bias) | Other bias |
|--------------------------|---------------------------------------------|-----------------------------------------|-----------------------------------------------------------|-------------------------------------------------|------------------------------------------|--------------------------------------|------------|
| Costa et al. (2017)      | +                                           | +                                       | +                                                         | ?                                               | +                                        | +                                    | +          |
| Davis et al. (2009)      | +                                           | ?                                       | +                                                         | ?                                               | +                                        | +                                    | +          |
| Davis et al. (2011)      | +                                           | +                                       | +                                                         | ?                                               | +                                        | +                                    | +          |
| Gatto et al. (2017)      | +                                           | +                                       | +                                                         | ?                                               | +                                        | +                                    | +          |
| Kaitosaari et al. (2006) | +                                           | +                                       | +                                                         | ?                                               | +                                        | +                                    | +          |
| Keszytys et al. (2017)   | ?                                           | +                                       | +                                                         | ?                                               | +                                        | +                                    | +          |
| Kong et al. (2013)       | +                                           | +                                       | +                                                         | ?                                               | +                                        | +                                    | +          |
| Nupponen et al. (2015)   | +                                           | ?                                       | +                                                         | ?                                               | +                                        | +                                    | ?          |
| Singhal et al. (2010)    | +                                           | +                                       | +                                                         | ?                                               | +                                        | ?                                    | +          |
| Wadolowska et al. (2019) | +                                           | +                                       | +                                                         | ?                                               | +                                        | +                                    | +          |

**Supplemental Figure S1.** Risk of bias summary: review of author's judgements on each risk of bias item for each included study.

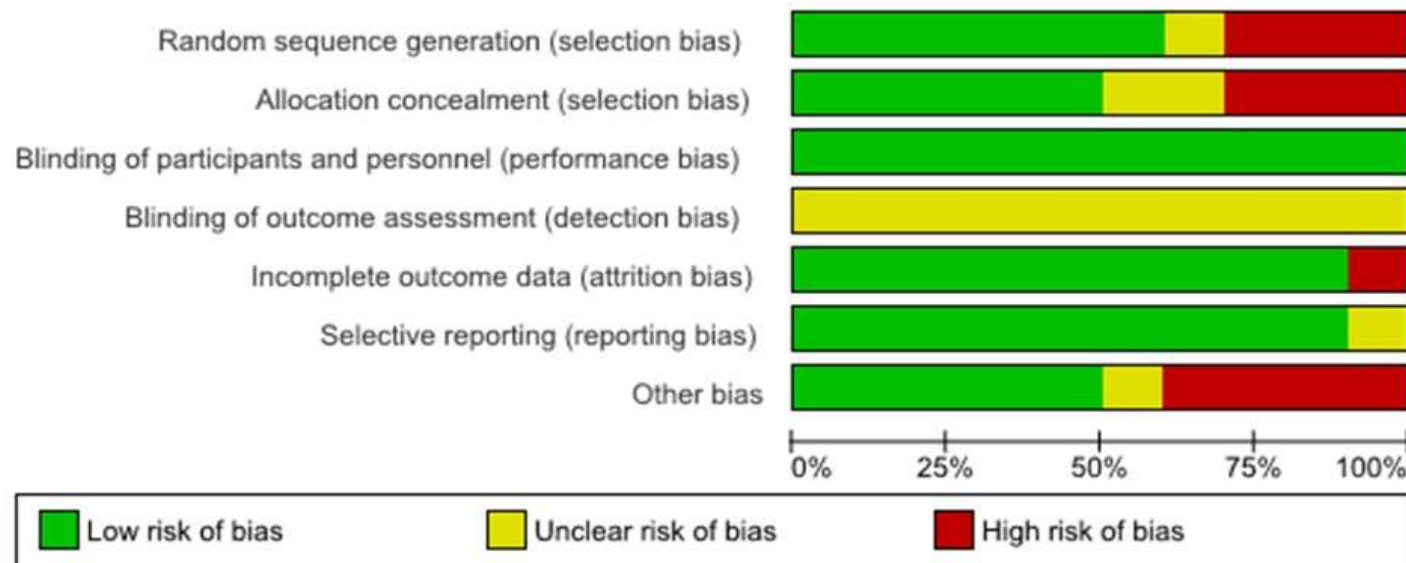

**Supplemental Figure S2.** Risk of bias graph: review of author's judgements on each risk of bias item presented as percentages across the studies.
